# Supplementary material for: A positive role for polycomb in transcriptional regulation via H4K20me1
Source: PubMed Central journal article supplement — Cell Res. 2016 Mar 22;26(5):529–42. doi: 10.1038/cr.2016.33 (PMC4856762; doi:10.1038/cr.2016.33), 2016-03-22
Supplement: cr201633x1.pdf [file cr201633x1.pdf]

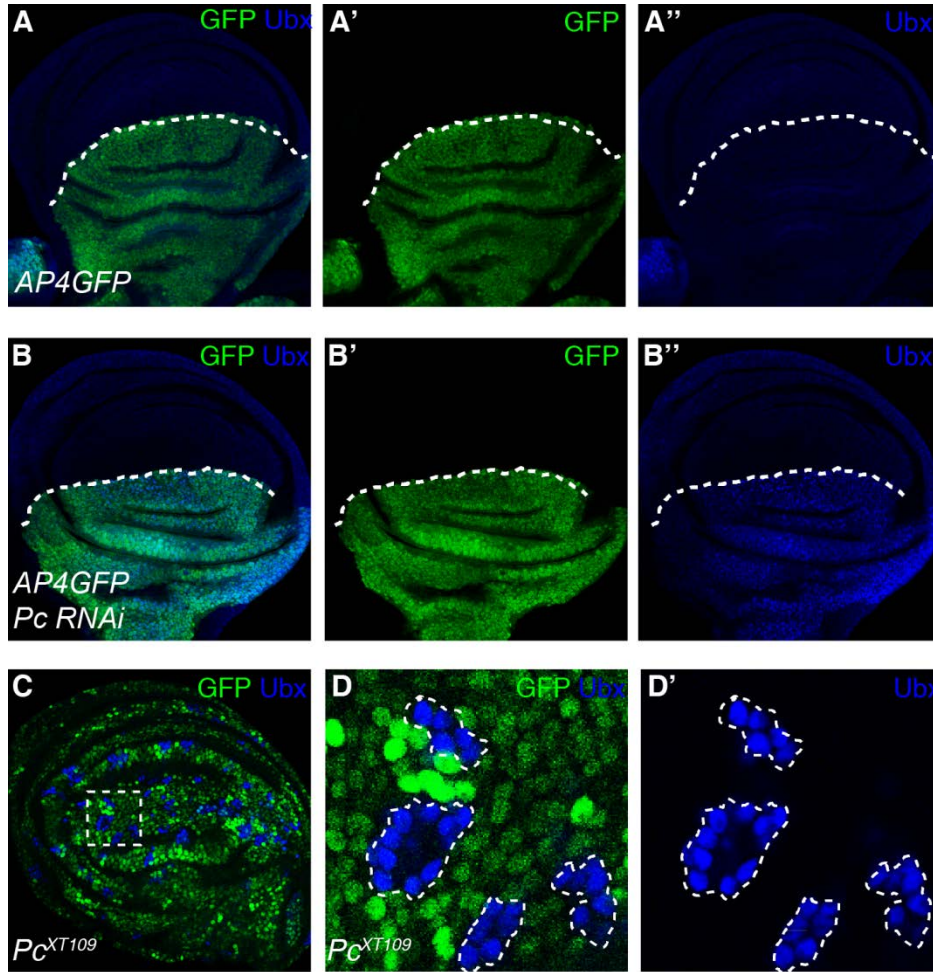

**Figure S1. Loss-of *Pc* leads to the derepression of *Ubx* in *Drosophila* wing disc.**

**Related to Figure 1**

(A-B'') Immunostaining of *AP4GFP* wing disc (A-A'') and *AP4GFP/uas-dsRNA Pc* wing disc (B-B'') using anti-*Ubx* antibody (blue). *Ubx* expression was repressed by PcG proteins in the whole control wing disc (A-A''), but derepressed at the dorsal compartment with *Pc* knocked down (B-B''), suggesting that the *uas-dsRNA Pc* works well. The GFP-positive region marks the RNAi region and the dashed lines mark the dorsal/ventral boundary.

(C-D') Low (C) and high (D-D') magnification of the wing disc carrying *Pc<sup>XT109</sup>* null

allele clones and immunostained to show Ubx (blue) and GFP (green). Dashed square in (C) marks the region magnified in d and d'.  $Pc^{XT109}$  null allele clones are indicated as GFP negative and the dashed lines (D-D') are show the boundaries of the clones. Ubx is activated dramatically in the clones.
