# Supplementary material for: A positive role for polycomb in transcriptional regulation via H4K20me1
Source: PubMed Central journal article supplement — Cell Res. 2016 Mar 22;26(5):529–42. doi: 10.1038/cr.2016.33 (PMC4856762; doi:10.1038/cr.2016.33), 2016-03-22
Supplement: cr201633x2.pdf [file cr201633x2.pdf]

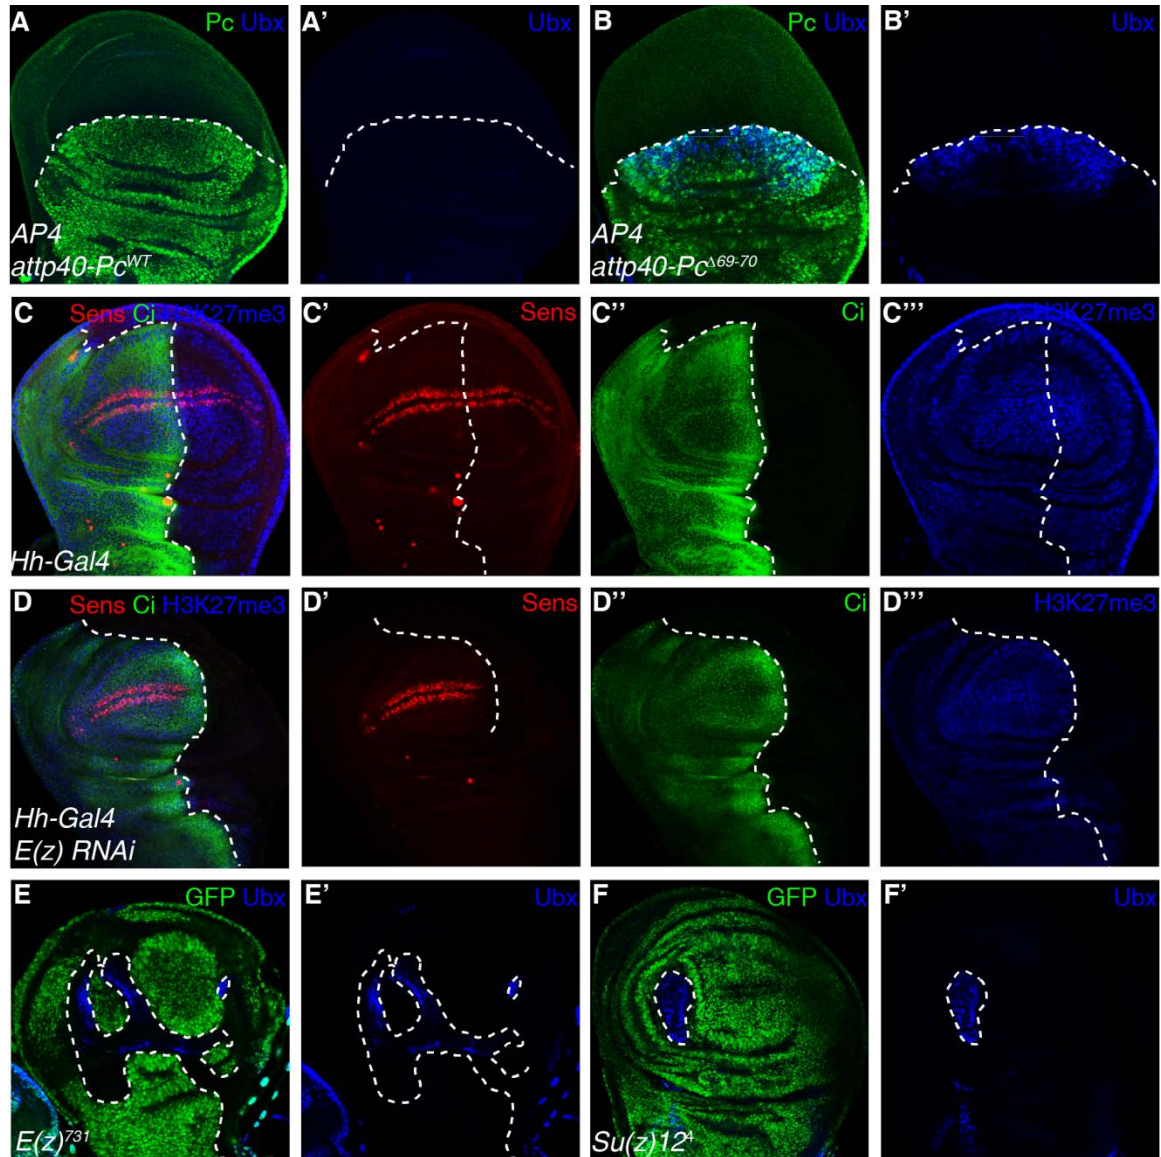

**Figure S2. The hierarchically recruited PcGs repress expression of *Ubx* but stimulate that of *Sens*. Related to Figure 2**

(A-B') Immunostaining of *AP4/attp40-Pc<sup>WT</sup>* (A-A') and *AP4/attp40-Pc<sup>A69-70</sup>* (B-B') wing discs using anti-Pc antibody (green) and anti-Ubx antibody (blue). Overexpression of *Pc<sup>A69-70</sup>*, but not *Pc<sup>WT</sup>*, derepressed Ubx. Dashed lines mark the dorsal/ventral boundary.

(C-D''') Immunostaining of the *Hh-Gal4* wing disc (C-C''') and *Hh-Gal4/uas-dsRNA E(z)* wing disc (D-D''') using the anti-Sens antibody (red), anti-Ci antibody (green) and

anti-H3K27me3 antibody (blue). The Ci-negative region defines the P compartment, where *Hh-Gal4* drives the expression of *uas-dsRNA E(z)*. Dash lines mark the anterior/posterior boundary. The level of Sens decreased dramatically in the P compartment where *E(z)* was knocked down specifically.

(E-F') Wing discs carrying *E(z)<sup>731</sup>* clones (E-E') or *Su(z)12<sup>4</sup>* clones (F-F') were immunostained with the anti-Ubx antibody (blue). Clones are indicated as GFP (green) negative and dashed lines are showing the boundaries of clones. Ubx was derepressed in the clones.
