# Supplementary material for: A positive role for polycomb in transcriptional regulation via H4K20me1
Source: PubMed Central journal article supplement — Cell Res. 2016 Mar 22;26(5):529–42. doi: 10.1038/cr.2016.33 (PMC4856762; doi:10.1038/cr.2016.33), 2016-03-22
Supplement: cr201633x3.pdf [file cr201633x3.pdf]

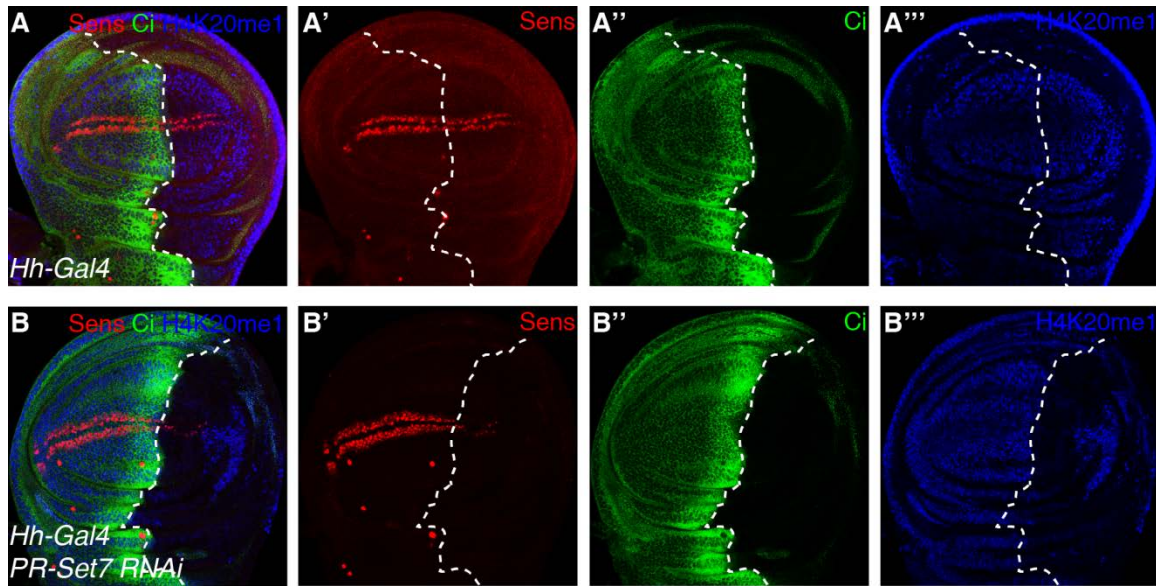

**Figure S3. Knockdown of PR-Set7 decreases H4K20me1 and Sens levels. Related to Figure 3**

(A-B''') Immunostaining of the *Hh-Gal4* wing disc (A-A''') and *Hh-Gal4/uas-dsRNA PR-Set7* wing disc (B-B''') using the anti-Sens antibody (red), anti-Ci antibody (green) and anti-H4K20me1 antibody (blue). The Ci-negative region defines the P compartment, where *Hh-Gal4* drives the expression of *uas-dsRNA PR-Set7*. Dashed lines mark the A/P boundary. The level of Sens decreased dramatically together with H4K20me1 in the P compartment where *PR-Set7* was knocked down specifically.
