# Supplementary material for: A positive role for polycomb in transcriptional regulation via H4K20me1
Source: PubMed Central journal article supplement — Cell Res. 2016 Mar 22;26(5):529–42. doi: 10.1038/cr.2016.33 (PMC4856762; doi:10.1038/cr.2016.33), 2016-03-22
Supplement: cr201633x4.pdf [file cr201633x4.pdf]

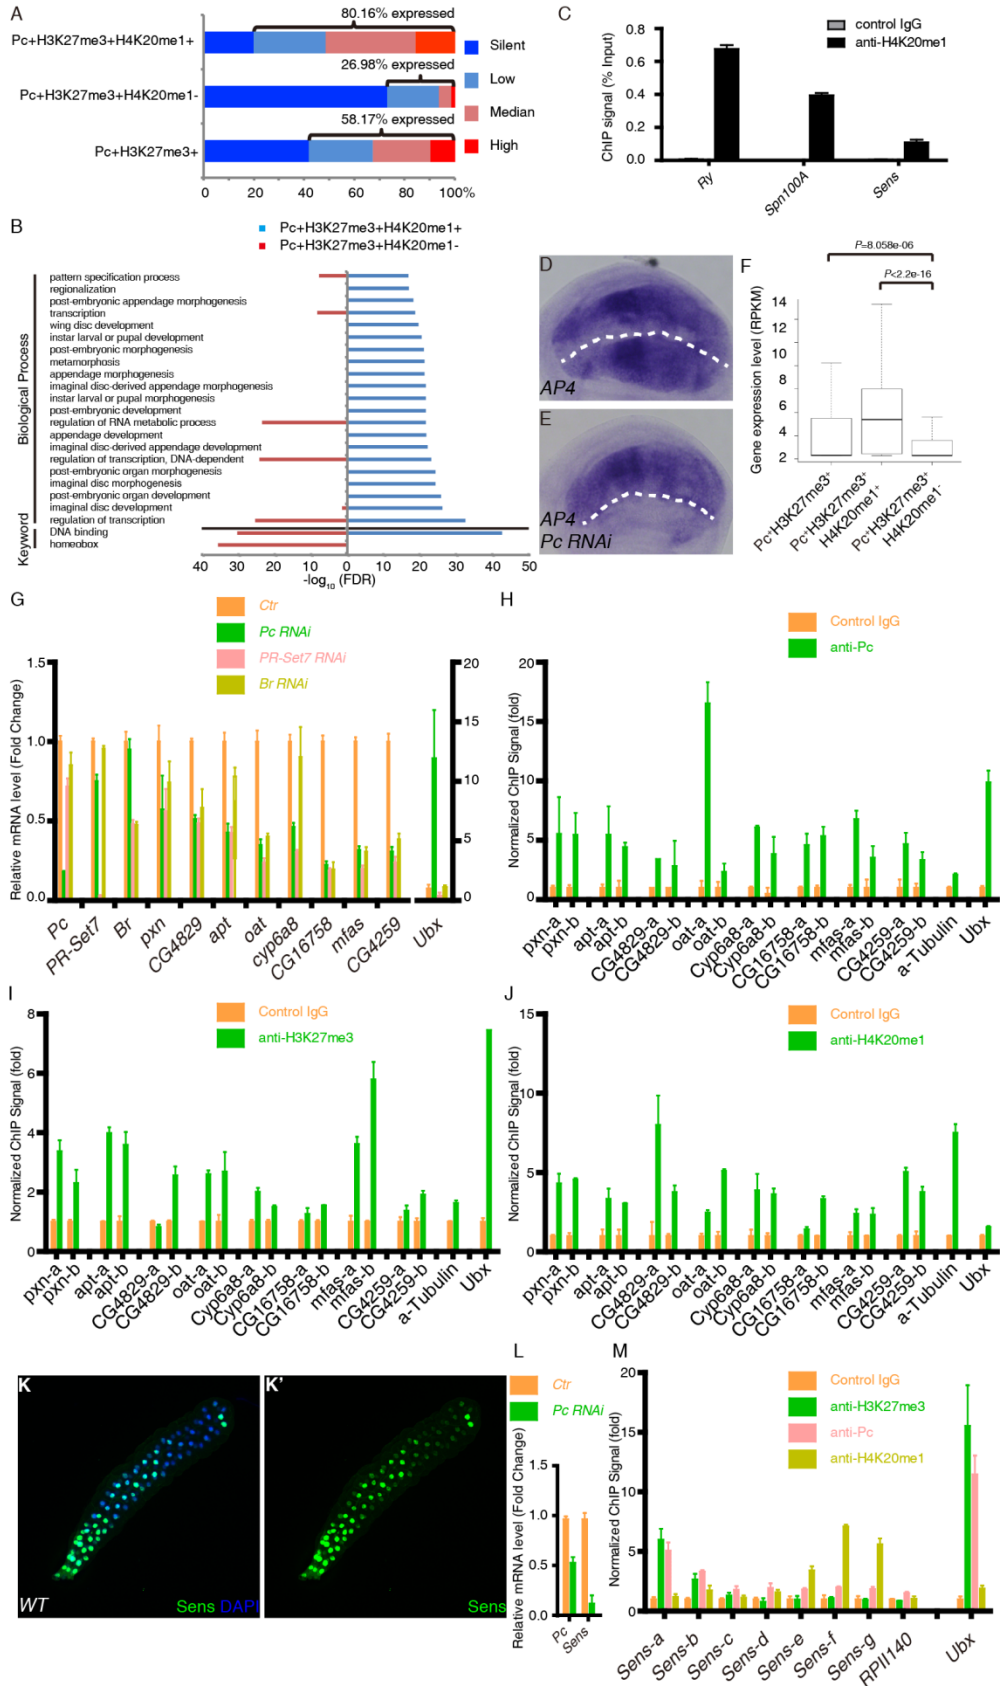

**Figure S4. Transcriptional regulation and functional analysis of the  $Pc^+H3K27me3^+H4K20me1^-$  genes and  $Pc^+H3K27me3^+H4K20me1^+$  genes. Related to Figure 4**

(A) The histogram showing the ratios of silent genes and expressed genes (with low, median or high levels of expression) in the indicated gene sets.

(B) Gene ontology (GO) analysis of the  $Pc^+H3K27me3^+H4K20me1^-$  and  $Pc^+H3K27me3^+H4K20me1^+$  genes. The most significant ontologies of  $Pc^+H3K27me3^+H4K20me1^+$  genes are DNA binding and development or morphogenesis while that of  $Pc^+H3K27me3^+H4K20me1^-$  genes are homeobox and DNA binding, suggesting different roles of these two sets of genes in wing discs.

(C) ChIP-qPCR analysis using control IgG (grey) or anti-H4K20me1 antibody (black) with the *Act5c-Gal4* wing disc at *Ry*, *Spn100A* and *Sens* loci. ChIP signal levels are represented as percentages of input chromatin.

(D-E) In situ hybridization analysis of *AP4* (D) or *AP4;Pc RNAi* (E) wing discs showed that *Spn100A* is expressed ubiquitously in WT (*AP4*) wing pouch (D), and its expression is down-regulated in the dorsal part below the dashed lines where *Pc* is knocked down specifically (E).

(F) Average expression levels of  $Pc^+H3K27me3^+H4K20me1^+$  genes are significantly higher than those of  $Pc^+H3K27me3^+H4K20me1^-$  genes in S2 cells. ChIP-seq (GSE32756, GSE24521 and GSE41440) and RNA-seq (GSE34390) data were from published references.

(G) RT-qPCR analysis of mRNA levels of indicated genes (a group of  $Pc^+H3K27me3^+H4K20me1^+$  genes from Figure S4F) in S2 cells treated with control dsRNA or dsRNA specifically targeting *Pc*, *PR-Set7* or *Br*.

(H-J) ChIP-qPCR assay with S2 cells using anti-*Pc* (H), anti-H3K27me3 (I), or anti-H4K20me1 (J) antibodies to verify the  $Pc^+H3K27me3^+H4K20me1^+$  genes tested in Figure S4G. Most of them are  $Pc^+H3K27me3^+H4K20me1^+$  genes.

(K-K') Wild type salivary gland was immunostained with anti-Sens antibody (green) and DAPI (blue). 55 layers were scanned with 5  $\mu$ m interval, and then merged to generate the final images. Sens expression was detected in every DAPI-positive cell.

(L) RT-qPCR analysis of indicated genes in salivary gland with indicated genotypes.

(M) ChIP-qPCR assay with salivary gland using anti-*Pc*, anti-H3K27me3 or anti-H4K20me1 antibodies.
