# Supplementary material for: A positive role for polycomb in transcriptional regulation via H4K20me1
Source: PubMed Central journal article supplement — Cell Res. 2016 Mar 22;26(5):529–42. doi: 10.1038/cr.2016.33 (PMC4856762; doi:10.1038/cr.2016.33), 2016-03-22
Supplement: cr201633x5.pdf [file cr201633x5.pdf]

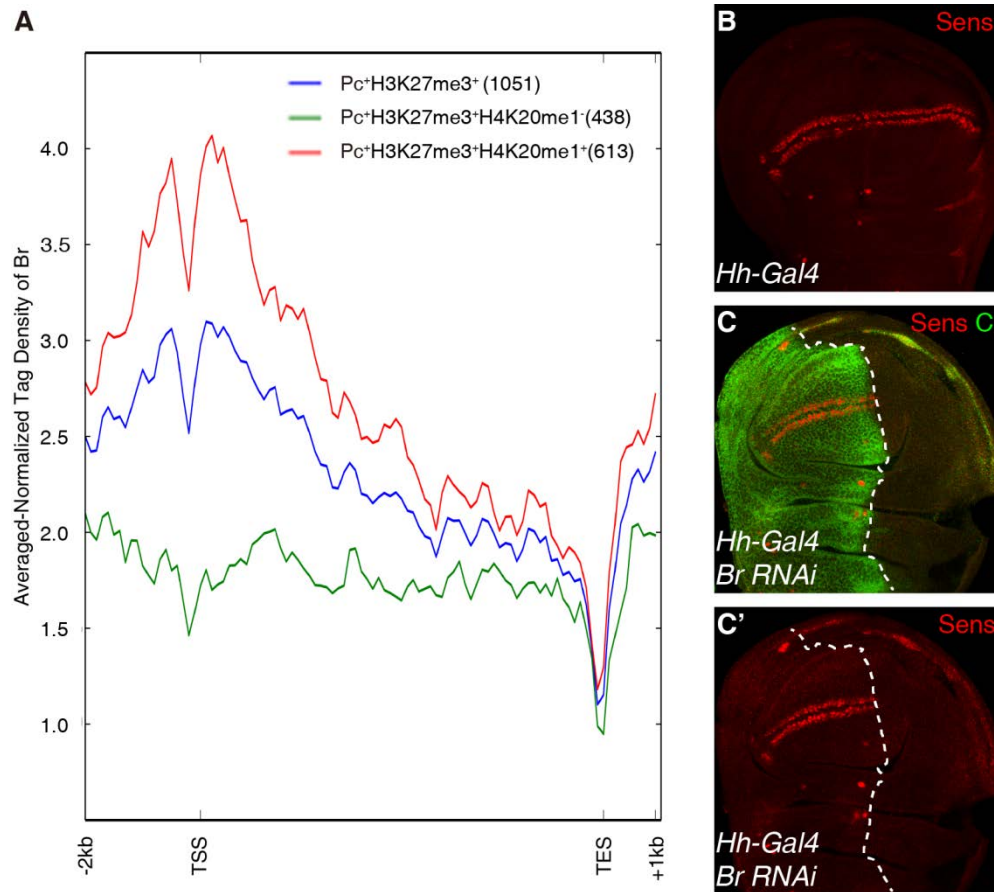

**Figure S5. Function of Br in positive transcriptional regulation. Related to Figure 5**

(A) Averaged-normalized tag density of Br in indicated gene sets. Br mainly binds to  $Pc^+H3K27me3^+H4K20me1^+$  genes, consistent with our motif analysis result that this motif was specifically identified in  $Pc^+H3K27me3^+H4K20me1^+$  genes but not in  $Pc^+H3K27me3^+H4K20me1^-$  genes.

(B-C') Immunostaining of the WT wing disc (B) or the wing disc expressing *uas-dsRNA Br* driven by *Hh-Gal4* (C-C') using the anti-Sens antibody (red) and anti-Ci antibody (green). The Ci-negative region defines the posterior (P) compartment, with dashed lines marking the A/P boundary. The level of Sens decreased dramatically in the P compartment where *Br* was knocked down specifically.
