# Supplementary material for: A positive role for polycomb in transcriptional regulation via H4K20me1
Source: PubMed Central journal article supplement — Cell Res. 2016 Mar 22;26(5):529–42. doi: 10.1038/cr.2016.33 (PMC4856762; doi:10.1038/cr.2016.33), 2016-03-22
Supplement: cr201633x6.pdf [file cr201633x6.pdf]

**Supplementary Table 1. Primers for RT-qPCR**

| <b>primer</b>  | <b>forward</b>           | <b>reverse</b>           |
|----------------|--------------------------|--------------------------|
| <i>Rpl32</i>   | CTAAGCTGTCGCACAAATGG     | AGGAACTTCTTGAATCCGGTG    |
| <i>Pc</i>      | GGGAATTTACAAACTCCTGCT    | ATGTACAATCAATACCGGCA     |
| <i>Sens</i>    | CAGGAATTTCCAGTGCAAACAG   | CGCCGGTATGTATGTACGTG     |
| <i>Ubx</i>     | CGAGGAAATCCGTCAGCAGAC    | CAGAGTAACCAATTTGTTTTTCAC |
| <i>E(z)</i>    | CTCGAAGGCATTATGAATAGCAC  | GCTCGTCCCAGTTTCTTATCC    |
| <i>PR-Set7</i> | AATCTGGTAACACTAACCGAC    | AAACTGCAATTACCTCGCTC     |
| <i>Ry</i>      | CAGTCTACTCTTCCAAGGCAG    | GGGTATTTCAAGCAGTTCCGT    |
| <i>Spn100A</i> | GCACCTACCTTCTGTCAGTC     | AAACTCATCGCTGCCATCTC     |
| <i>Br</i>      | CTCTAACAACAATGCCAATGCC   | GCGACATGATGAACTGAGGG     |
| <i>pxn</i>     | GACATACAATGGTTCGTC AATGG | AATTTCCGGGCAGTTCCTTCAG   |
| <i>CG4829</i>  | ATCGTGCTAATCTGCTTTATCGG  | TGTTGTTGCTAATCCTGATGGT   |
| <i>apt</i>     | TACAAATTCAATCCCGAAGACC   | CGACTGATGCTGTGATTAGG     |
| <i>oat</i>     | GACATTATTCGCTTCGCTCC     | AACGCTATTCGCTATACATGAG   |
| <i>cyp6a8</i>  | TTTAGATGAAACTCTGCGACTG   | ATGACCGATTGACCAGCC       |
| <i>CG16758</i> | GGACACAGCAATGGAAATGG     | ATAGGGATACGTGGGATTCTC    |
| <i>mfas</i>    | CCATCTTCTTCCAGCAATCGT    | CCATCTTCTTCCAGCAATCGT    |
| <i>CG4259</i>  | TTGCGTTTCTCACGACACTG     | GCAGTAAGGACCACATTTGGA    |
