# Supplementary material for: A positive role for polycomb in transcriptional regulation via H4K20me1
Source: PubMed Central journal article supplement — Cell Res. 2016 Mar 22;26(5):529–42. doi: 10.1038/cr.2016.33 (PMC4856762; doi:10.1038/cr.2016.33), 2016-03-22
Supplement: cr201633x7.pdf [file cr201633x7.pdf]

**Supplementary Table 2. Primers for ChIP-qPCR**

| <b>primer</b>   | <b>forward</b>           | <b>reverse</b>           |
|-----------------|--------------------------|--------------------------|
| <i>Sens-a</i>   | CGCCAAGGATAGATAAACTGGA   | ATTAAACCACTCAGATAGGACGAC |
| <i>Sens-b</i>   | CTAACTGTGCGTCTTGACCC     | TATTGTTGGTGTGGTGTTCGT    |
| <i>Sens-c</i>   | TGCCACAAGTAACCACAGTC     | TCAGTTCTAAATTGAGCCAACGG  |
| <i>Sens-d</i>   | AAACCGCACTGAATAAGACC     | TTCTCAATACTGTTCACTGCAC   |
| <i>Sens-e</i>   | GTAAATCAGATCCAGTGAGATTCC | GAGGCTATCACAGTGTGAAGG    |
| <i>Sens-f</i>   | CAACTGCATCCGATGACCT      | TGTTACCCTGCGATCTCTG      |
| <i>Sens-g</i>   | GGGTAGGGAAATATGAAGAGGA   | GTGATAAGCCCATTAAGCGG     |
| <i>Ry</i>       | GATACAGCGAGATACCGTGAG    | GGCATCCGAGTATCTTTAAGTACC |
| <i>Spn100A</i>  | AATTCAGGTAGCAGATCTTCCA   | CTAAGTCCCTCCGTTTCGTC     |
| <i>pxn-a</i>    | TAGAGCACTTTGCGTAATTGG    | ACAGCTCTACAACTCTTTGG     |
| <i>pxn-b</i>    | TGATGCTCGCATAGTTTATGCC   | ACATGCTGTATGCCTTATGCC    |
| <i>CG4829-a</i> | CGCAATCACCGATCCTTCTG     | AAGCCATCCTCCTCGTACTC     |
| <i>CG4829-b</i> | ATGGTGATGGTGTGGTAATG     | CGTTCACCTTCCGACTGAAT     |
| <i>apt-a</i>    | GTGAGATTACGCATCCGAG      | AACTAAGCCAAGACAAGATGAG   |
| <i>apt-b</i>    | GAAGGTGTGGTGTAGGTGTG     | GAAACAACAACTAAGTGCCGA    |
| <i>oat-a</i>    | GGCTGATGCTAACTGAAAGTC    | GATAAGGCAGGAGTGATGTCAG   |
| <i>oat-b</i>    | TTTCCTGATTATGTCGATGCTC   | CATTAGTTCTGCCCAAGTTGTC   |
| <i>cyp6a8-a</i> | GCAGATGAGGGTATGATGAC     | GGACATTCAAGATAAGGTTCCG   |

|                  |                       |                        |
|------------------|-----------------------|------------------------|
| <i>cyp6a8-b</i>  | CGATGACGAAGTTTGGATGAC | GCACCAAGGATCTGAAGTACC  |
| <i>CG16758-a</i> | CGACCGCTGATTGTAAAGTG  | GATTCCGAACCCAAATCCGA   |
| <i>CG16758-b</i> | ACTTCTTCACGTTTGTTCCT  | AATCCGAAGCCGAATCAAAGTC |
| <i>mfas-a</i>    | AACAGGTGAGATGAGTGGAGT | ACATTTAACCCACCCATTGCC  |
| <i>mfas-b</i>    | CGGCAATGGGTGGGTAAAT   | CACATCACTCTACACCACGTC  |
| <i>CG4259-a</i>  | AGAACTTACCCTGCGAACTC  | CATTTGCTTGGATCGTTGTG   |
| <i>CG4259-b</i>  | CTTCAGCATCCAATTAGCGG  | CTTGTTAGAAAGAGTGCGAGTG |
